# Supplementary material for: The estimates of carbon sequestration potential in an expanding Arctic fjord affected by dark plumes of glacial meltwater (Hornsund, Svalbard)
Source: Copernicus journal article supplement (doi:10.5194/bg-2023-162), 2023-09-29
Supplement: Supplementary file 1 [file bg-2023-162-supplement.pdf]

Supplementary Table 1 List of satellite images used in this study

| Year | Satellite images                         | Resolution [m] | Bands       |
|------|------------------------------------------|----------------|-------------|
| 1976 | LM02_L1GS_230004_19760718_20180423_01_T2 | 60             | 3-2-1       |
| 1980 | LM02_L1GS_229005_19800801_20210624_02_T2 | 60             | 4           |
| 1985 | LM05_L1GS_211005_19850726_20210919_01_T2 | 60             | 3-2-1       |
| 1990 | LM05_L1GS_212005_19900901_20211008_02_T2 | 30             | 3-2-1       |
| 1995 | LT05_L1TP_208005_19950903_20200912_02_T2 | 30             | 3-2-1       |
| 2000 | LE07_L1TP_213005_20000725_20200918_02_T1 | 15             | 3-2-1 and 8 |
|      | LE07_L1TP_209005_20000729_20200917_02_T1 |                |             |
| 2006 | LT05_L1TP_210005_20060814_20201008_02_T2 | 30             | 3-2-1       |
| 2010 | LE07_L1TP_210005_20100817_20200910_02_T1 | 15             | 3-2-1 and 8 |
| 2015 | LC08_L1TP_209005_20150731_20200908_02_T1 | 15             | 4-3-2 and 8 |
| 2019 | LC08_L1TP_212005_20190816_20190902_01_T1 | 15             | 4-3-2 and 8 |
| 2022 | LC08_L1TP_028239_20220815_20220823_02_T2 | 15             | 4-3-2 and 8 |

Supplementary Table 2 Location of the data points

| Variable                                                                 | Data type      | Location                                                     |
|--------------------------------------------------------------------------|----------------|--------------------------------------------------------------|
| Sea surface temperature (SST)                                            | Satellite data | HOR: 77.000°N 15.325°E; 77.000°N 15.375°E; 77.000°N 15.425°E |
| Sea ice concentration (SIC)                                              |                | HOR: 76.950°N 16.225°E; 76.950°N 16.275°E; 76.950°N 16.325°E |
| Suspended particulate matter (SPM),<br>sedimentation flux (SF), salinity | Field data     | M5 (H1_11): 77.017°N 15.636°E                                |
|                                                                          |                | M4 (H1_09): 77.012°N 15.629°E                                |
|                                                                          |                | M3 (H1_08): 77.009°N 15.624°E                                |
|                                                                          |                | M2 (H1_06): 77.003°N 15.624°E                                |
|                                                                          |                | M1 (H1_04): 70.000°N 15.623°E                                |
| Air temperature (AT) and precipitation                                   |                | PPS (Polish Polar Station Hornsund): 77.000°N 15.550°E       |

Supplementary Table 3 List of state variables

| N  | Abbr.                   | Definition                                                       | Initial value | Unit                   |
|----|-------------------------|------------------------------------------------------------------|---------------|------------------------|
| 1  | <i>F</i>                | Flagellates                                                      | 0.1           | mgC·m <sup>-3</sup>    |
| 2  | <i>D</i>                | Diatoms                                                          | 0.1           | mgC·m <sup>-3</sup>    |
| 3  | <i>Chl<sub>F</sub></i>  | Chlorophyll <i>a</i> for flagellates (prognostic state variable) | 0.005         | mgC·m <sup>-3</sup>    |
| 4  | <i>Chl<sub>D</sub></i>  | Chlorophyll <i>a</i> for diatoms (prognostic state variable)     | 0.005         | mgC·m <sup>-3</sup>    |
| 5  | <i>Z<sub>S</sub></i>    | Microzooplankton                                                 | 0.01          | mgC·m <sup>-3</sup>    |
| 6  | <i>Z<sub>L</sub></i>    | Mesozooplankton                                                  | 0.01          | mgC·m <sup>-3</sup>    |
| 7  | <i>MB</i>               | Macrobenthos                                                     | 0.5           | mgC·m <sup>-3</sup>    |
| 8  | <i>iSPM</i>             | Inorganic Suspended Particulate Matter                           | 0.0           | mg·m <sup>-3</sup>     |
| 9  | <i>D<sub>1</sub></i>    | Fast sinking detritus                                            | 0.0           | mgC·m <sup>-3</sup>    |
| 10 | <i>D<sub>2</sub></i>    | Slow sinking detritus                                            | 0.1           | mgC·m <sup>-3</sup>    |
| 11 | <i>DOM</i>              | Dissolved Organic Matter                                         | 3.0           | mgC·m <sup>-3</sup>    |
| 12 | <i>NH<sub>4</sub></i>   | Ammonium                                                         | 50.0          | mmolN·m <sup>-3</sup>  |
| 13 | <i>NO<sub>3</sub></i>   | Nitrate                                                          | 1035.0        | mmolN·m <sup>-3</sup>  |
| 14 | <i>PO<sub>4</sub></i>   | Phosphate                                                        | 1100.0        | mmolP·m <sup>-3</sup>  |
| 15 | <i>SiO<sub>2</sub></i>  | Silicate                                                         | 300.0         | mmolSi·m <sup>-3</sup> |
| 16 | <i>Opal</i>             | Biogenic Opal                                                    | 2.0           | mmolSi·m <sup>-3</sup> |
| 17 | <i>O<sub>2</sub></i>    | Oxygen                                                           | 85.0          | ml·l <sup>-1</sup>     |
| 18 | <i>S<sub>CN</sub></i>   | Sediment Carbon Nitrogen                                         | 0.0           | mg·m <sup>-3</sup>     |
| 19 | <i>S<sub>P</sub></i>    | Sediment Phosphate                                               | 0.0           | mgC·m <sup>-3</sup>    |
| 21 | <i>S<sub>S</sub></i>    | Sediment Silicate                                                | 0.0           | mgC·m <sup>-3</sup>    |
| 22 | <i>S<sub>iSPM</sub></i> | Sediment iSPM                                                    | 0.0           | mgC·m <sup>-3</sup>    |

Supplementary Table 4 Literature data for model assessment in the West Spitsbergen fjords: KGF – Kongsfjorden, HOR – Hornsund, ISF – Isfjorden, Rij - Rijpfjorden

| Variable                                                                                        | KGF                                | HOR                       | ISF  | RIJ         | Reference                                                                                                      |
|-------------------------------------------------------------------------------------------------|------------------------------------|---------------------------|------|-------------|----------------------------------------------------------------------------------------------------------------|
| <b>Silicate</b> [ $\mu\text{mol}\cdot\text{l}^{-1}$ ]                                           | 1.9 -6.0                           | 1.0 -6.0                  |      |             | Hegseth and Tverberg 2013;                                                                                     |
| <b>Nitrates</b> [ $\mu\text{mol}\cdot\text{l}^{-1}$ ]                                           | <0.67                              | <1.96                     |      |             | Węśławski et al. 1988;                                                                                         |
| <b>Phosphates</b> [ $\mu\text{mol}\cdot\text{l}^{-1}$ ]                                         | 0.83                               | 0.3                       |      |             | Hodal et al. 2012<br>Eilertsen et al. 1989;<br>Węśławski et al. 1988;<br>Hodal et al. 2012;                    |
| <b>Ice algae</b> [ $\text{mgC}\cdot\text{m}^{-2}$ ]                                             |                                    |                           |      | 50 – 450    | Leu et al., 2017                                                                                               |
| <b>Phytoplankton</b> [ $\text{gC}\cdot\text{m}^{-2}$ ]                                          | 0.254 – 2.77                       | 0.608 - 2.1               |      | <0.002      | Piwosz et al., 2009<br>Błachowiak-Samołyk et al., 2015                                                         |
| <b>Zooplankton</b> [ $\text{gC}\cdot\text{m}^{-2}$ ]                                            |                                    |                           | 1-6  | 6-8         | Zajączkowski et al., 2010<br>Błachowiak-Samołyk et al., 2015                                                   |
| <b>Macrobenthos</b> [ $\text{gC}\cdot\text{m}^{-2}$ ]                                           | 4.8 – 7.73                         | 6.44 – 20.48              |      | 2.31 – 8.34 | Włodarska-Kowalczyk et al., 2019                                                                               |
| <b>Summer pelagic primary production</b> [ $\text{mgC}\cdot\text{m}^{-2}\cdot\text{day}^{-1}$ ] | 59 -108<br>80 - 155                | 173 - 1333                |      |             | Piwosz et al., 2009<br>Iversen and Seuthe, 2011                                                                |
| <b>Spring pelagic primary production</b> [ $\text{mgC}\cdot\text{m}^{-2}\cdot\text{day}^{-1}$ ] | 405 - 445<br>30 - 1850             | 320 - 2770                | 42.6 |             | Iversen and Seuthe, 2011<br>Hodal et al., 2012<br>Vonnahme et al., 2021                                        |
| <b>Zoobenthos production</b> [ $\text{gC}\cdot\text{m}^{-2}\cdot\text{y}^{-1}$ ]                | 9.4<br>2.1 – 6.6                   | 19.2<br>1.2 – 2.6         |      |             | Włodarska-Kowalczyk et al., 2019<br>Zaborska et al., 2018 (only macro.)                                        |
| <b>Burial rate of OC</b> [ $\text{gC}\cdot\text{m}^{-2}\cdot\text{y}^{-1}$ ]                    | 28 ± 6<br>9 - 13<br>5.7-10.0<br>15 | 28 ± 1<br>19.3-30.3<br>38 |      |             | Włodarska-Kowalczyk et al., 2019<br>Kuliński et al., 2014<br>Koziorowska et al., 2018<br>Zaborska et al., 2018 |

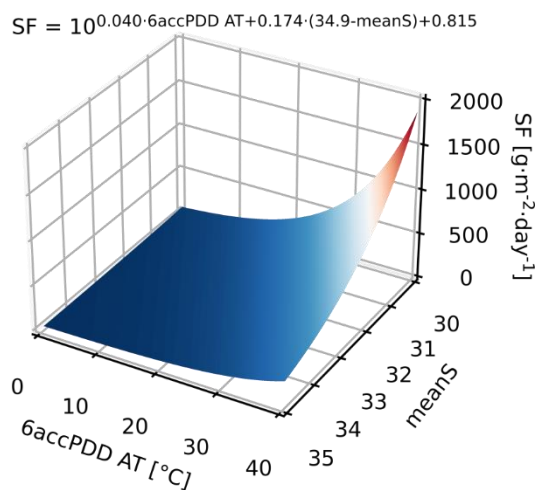

Supplementary Figure 1 Inorganic sediment flux as a function of 6accPDD AT and mean salinity. 6accPDD is the accumulated daily temperature for positive degree days for 6 days window ( $^{\circ}\text{C}$ ), 34.9 is a reference salinity for Atlantic Water (Moskalik et al., 2018), and meanS is the mean salinity above the sediment trap.

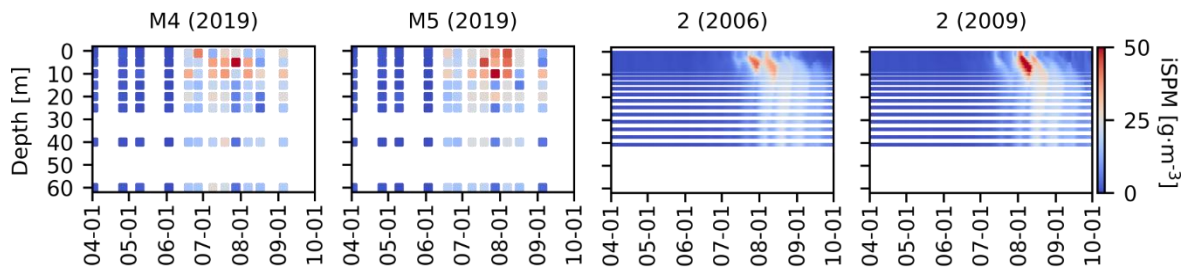

Supplementary Figure 2 Inorganic SPM concentration (iSPM,  $\text{g}\cdot\text{m}^{-3}$ ) at monitoring stations (M4 and M5) in 2019 and at modelled station (2) in 2006 and 2009.

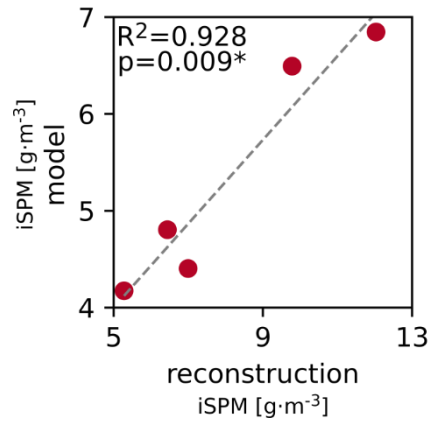

Supplementary Figure 3 Assessment of inorganic SPM (iSPM) simulations at station HH1 (2): correlation of mean summer-time integrated iSPM concentration from reconstruction and model for 2005-2009 ( $\text{g}\cdot\text{m}^{-3}$ ).

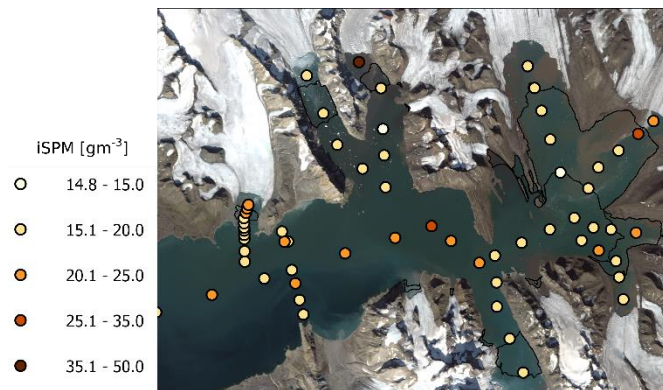

Supplementary Figure 4 Spatial distribution of inorganic SPM (iSPM) concentrations in Hornsund in summer 2017 (late July-early August, 0 m). The black lines indicate newly ice-free areas extent in 2006. Landsat8 satellite image (04/08/2020) downloaded from <https://glovis.usgs.gov/app>.

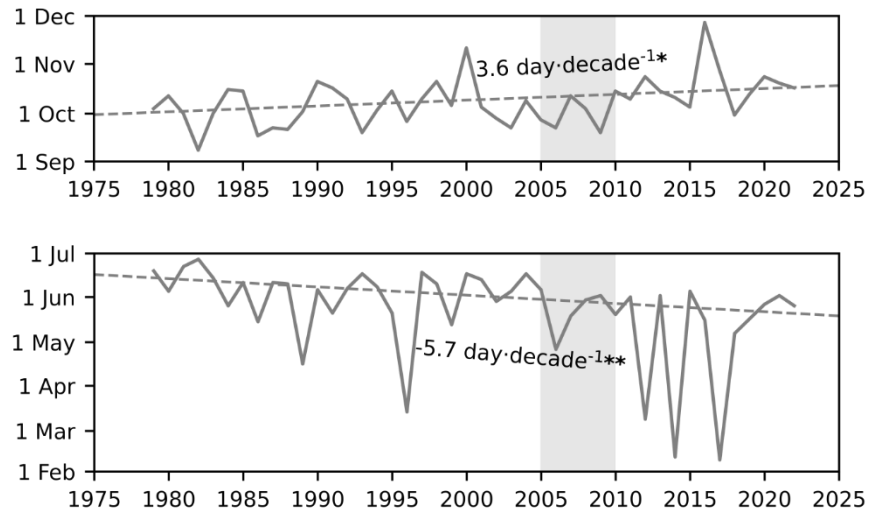

Supplementary Figure 5 The trends in a start and end of the melt season in Hornsund defined as the start of the first six consecutive days when daily average air temperatures exceed or fall below 0°C, respectively. \*  $p < 0.05$ , \*\*  $p < 0.001$  for Modified Mann Kendall Test.
