# Supplementary material for: The estimates of carbon sequestration potential in an expanding Arctic fjord affected by dark plumes of glacial meltwater (Hornsund, Svalbard)
Source: Copernicus journal article supplement (doi:10.5194/bg-2023-162), 2023-09-29
Supplement: Supplementary file [file bg-2023-162-AC1-supplement.pdf]

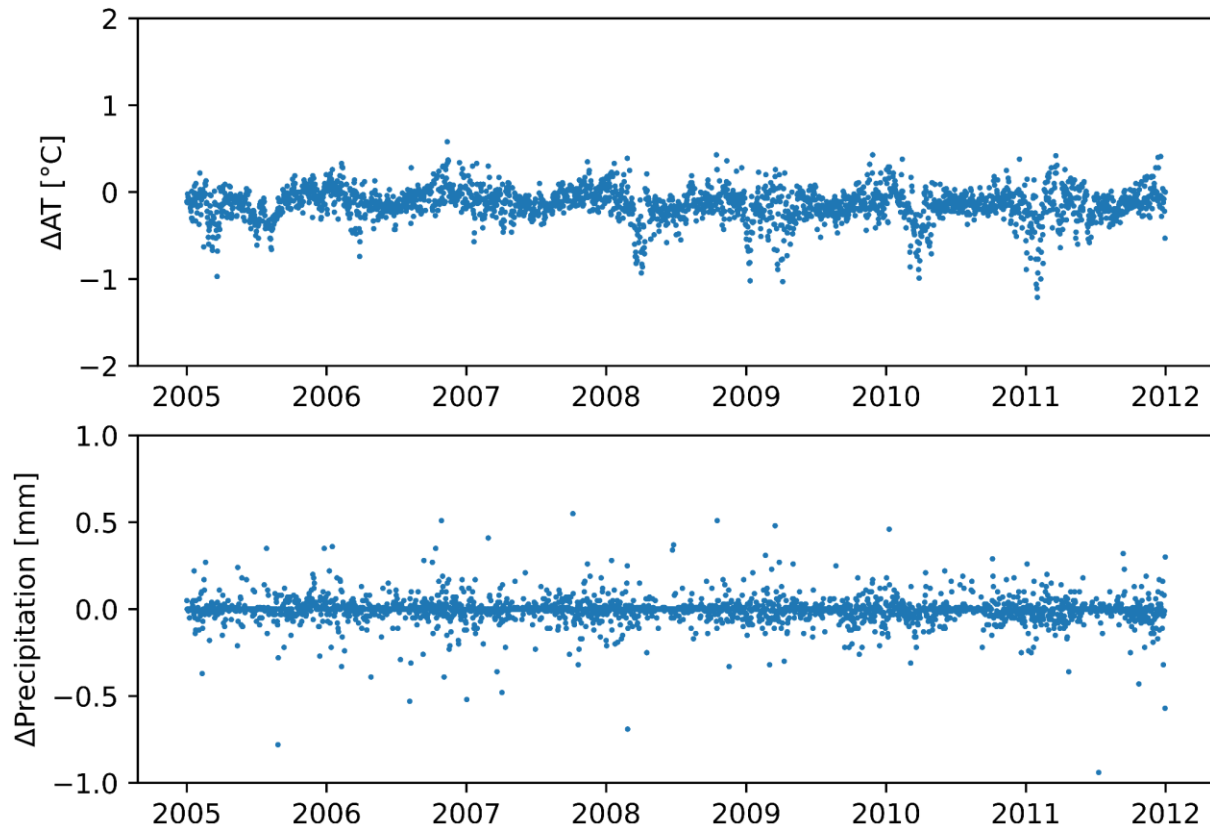

Sup. Fig. The differences in daily average air temperature (AT), and daily precipitation between the inner and outer fjord based on ERA interim reanalysis (Dee et al., 2011).

Table 1 Variables used to create the assessment and parametrization datasets, and for iSPM simulations

| iSPM reconstruction                   | iSPM in simulation results                                               | iSPM input to the model                                                                   | Parametrization of iSPM input                                                         |
|---------------------------------------|--------------------------------------------------------------------------|-------------------------------------------------------------------------------------------|---------------------------------------------------------------------------------------|
| SPM measurements<br>annual sum of PDD | $dC_{iSPM}/dt = C_{iSPM} + C_{iSPMinput}$<br><br>general system dynamics | Parametrization<br>6accPDD (Polish Polar Station)<br>Salinity (from Jakacki et al., 2018) | Sediment Flux measurements<br>6accPDD (Polish Polar Station)<br>Salinity measurements |

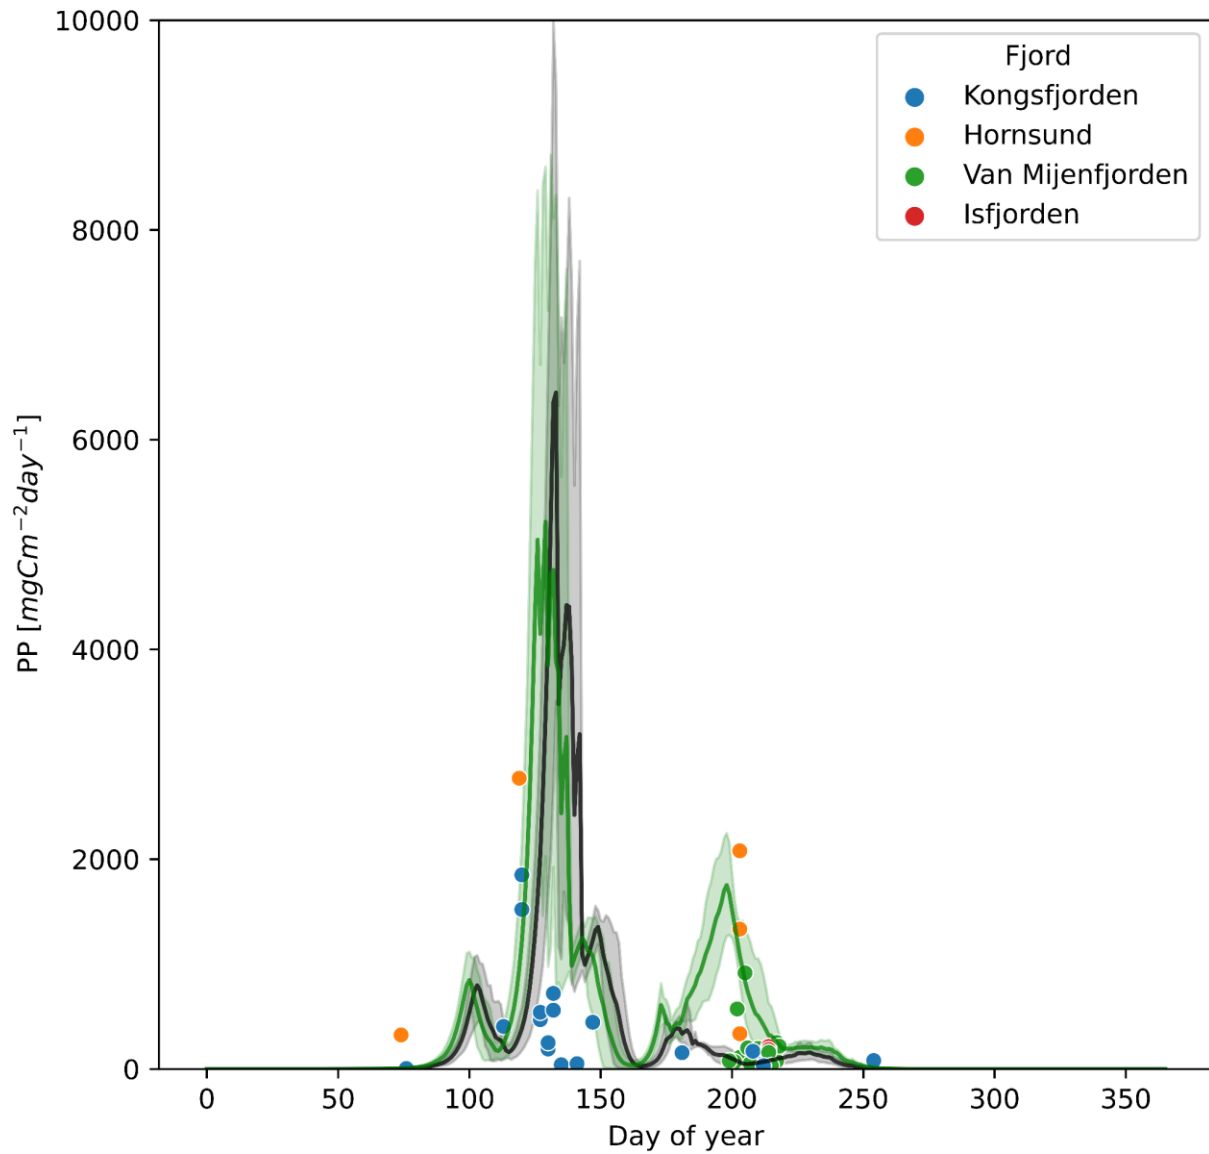

Sup. Fig. Comparison of pelagic primary production from the modeling (station H3, black - iSPM scenario, green - noSPM scenario; average for 2005-2009 with standard deviation) and field studies as reported by Hodal et al., 2012 (Kongsfjorden), Iversen and Seuthe 2011 (Kongsfjorden), Piwosz et al., 2009 (Kongsfjorden and Hornsund), Eilertsen et al., 1989 (Kongsfjorden, Isfjorden, Van Mijenfjorden and Hornsund).
