# Supplementary material for: The estimates of carbon sequestration potential in an expanding Arctic fjord affected by dark plumes of glacial meltwater (Hornsund, Svalbard)
Source: Copernicus journal article supplement (doi:10.5194/bg-2023-162), 2023-09-29
Supplement: Supplementary file [file bg-2023-162-AC2-supplement.pdf]

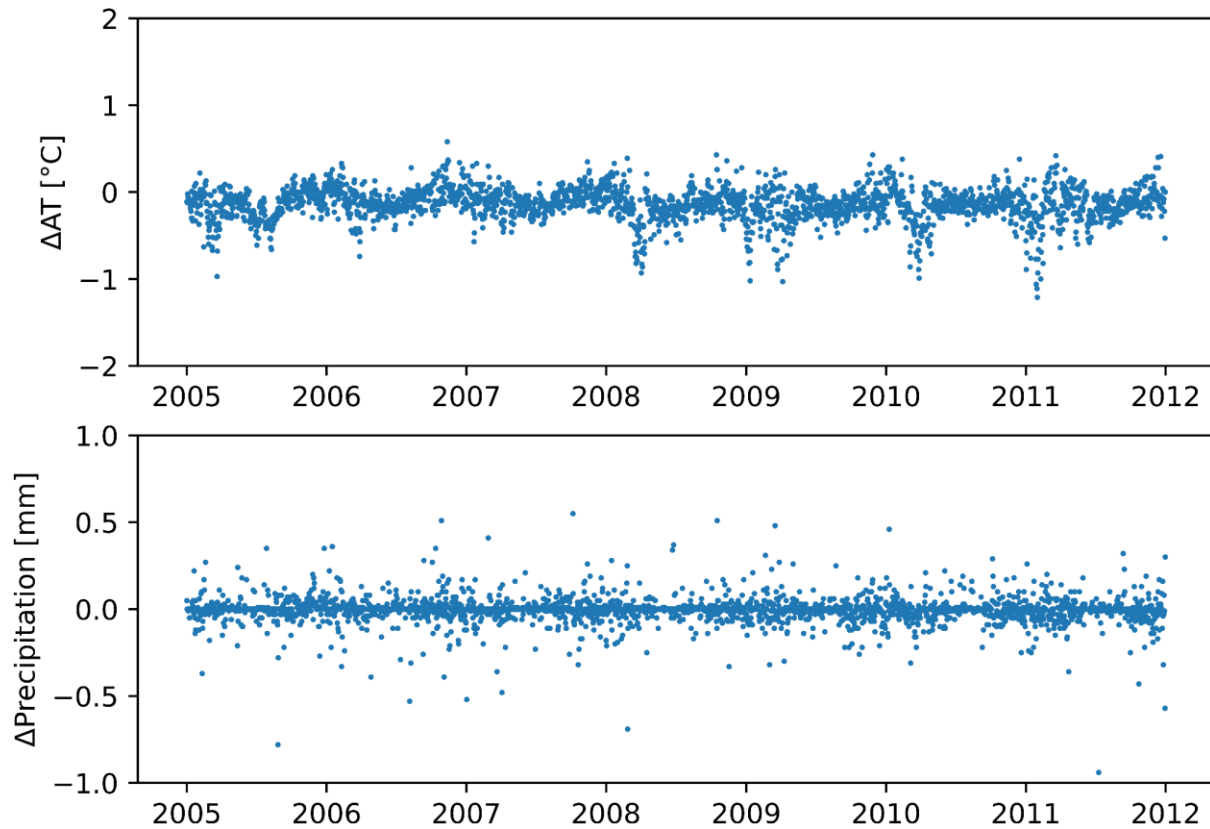

Sup. Fig. The differences in daily average air temperature (AT), and daily precipitation between the inner and outer fjord based on ERA-interim reanalysis (Dee et al., 2011).

Table 1 Variables used to create the assessment and parametrization datasets, and for iSPM simulations

| iSPM reconstruction                   | iSPM in simulation results                                               | iSPM input to the model                                                                   | Parametrization of iSPM input                                                         |
|---------------------------------------|--------------------------------------------------------------------------|-------------------------------------------------------------------------------------------|---------------------------------------------------------------------------------------|
| SPM measurements<br>annual sum of PDD | $dC_{iSPM}/dt = C_{iSPM} + C_{iSPMinput}$<br><br>general system dynamics | Parametrization<br>6accPDD (Polish Polar Station)<br>Salinity (from Jakacki et al., 2018) | Sediment Flux measurements<br>6accPDD (Polish Polar Station)<br>Salinity measurements |

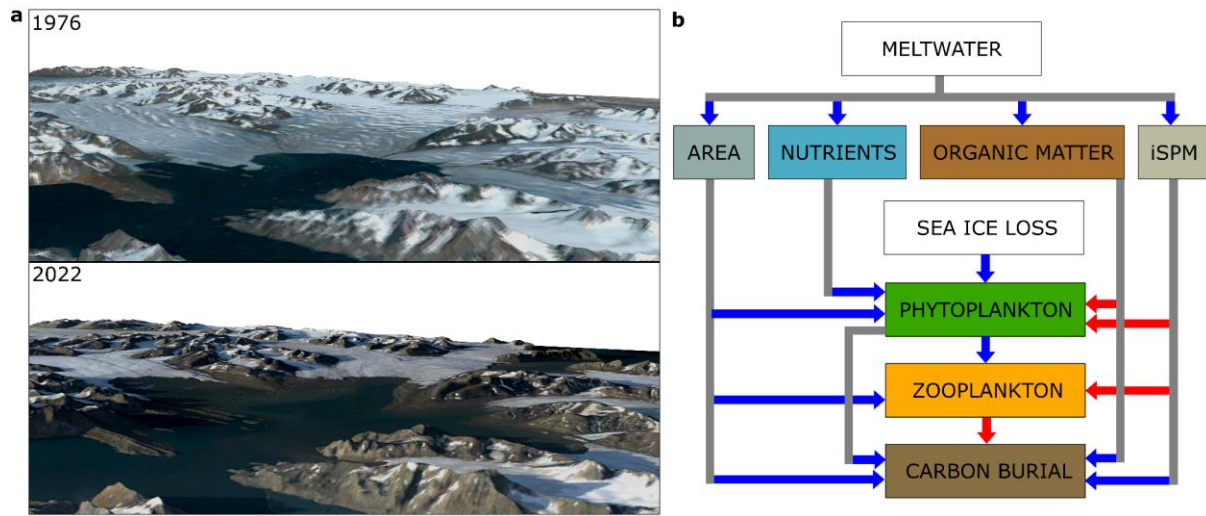

Figure 7
